# Supplementary material for: Details behind the dots: How different intensive care units used common and contrasting methods to prevent ventilator associated pneumonia
Source: PubMed Central journal article supplement — BMJ Qual Improv Rep. 2015 Mar 12;4(1):u207660.w3069. doi: 10.1136/bmjquality.u207660.w3069 (PMC4645939; doi:10.1136/bmjquality.u207660.w3069), 2015-03-12
Supplement: bmjqir-4-u207660-w3069-s1.pdf [file bmjqir-4-u207660-w3069-s1.pdf]

### Flowchart for diagnosis of VAP

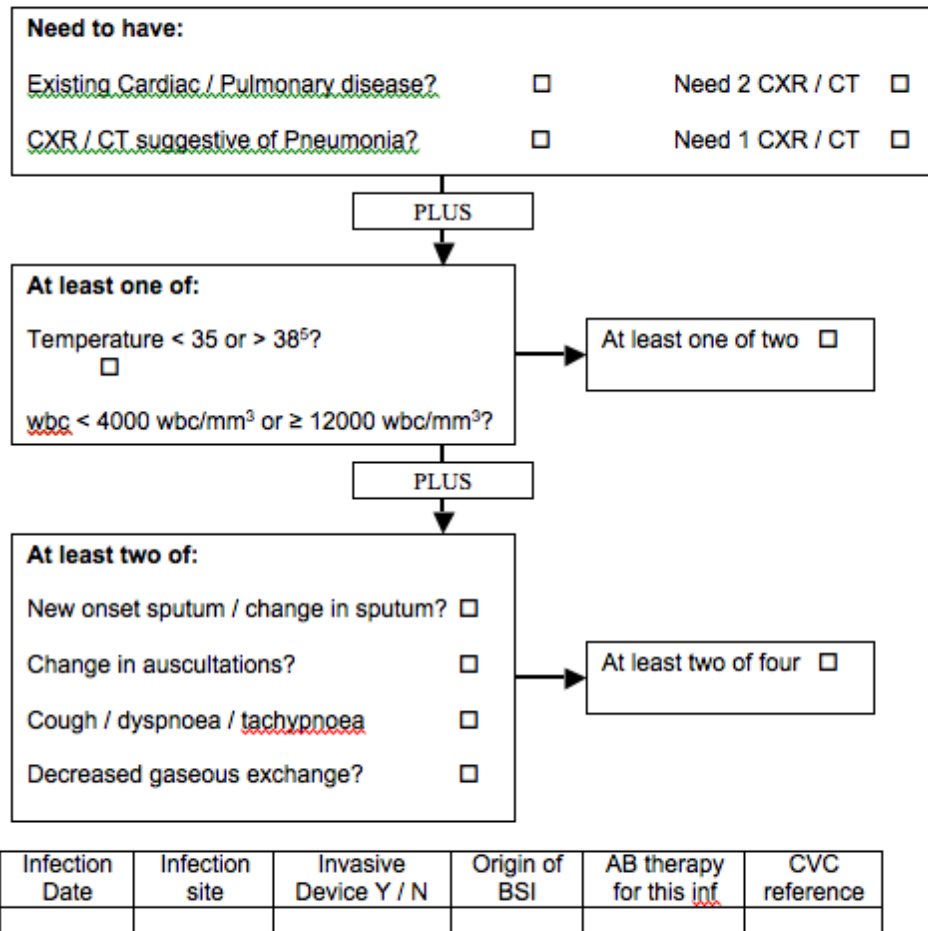

**A minimum of 4 yes are required for VAP diagnosis.**

Figure 1 Legend: Operational definition of VAP using objective criteria

Diagnosis of VAP was recorded if four of above criteria met:

One chest X-ray or CT scan with a suggestive image of pneumonia in patients without underlying cardiac or pulmonary disease, along with at least one of the following: high or low temperature or high or low white blood count (wbc); and at least two of four clinical features.

## Operational Definitions used in each ICU

| Bundle element                                                                    | Glasgow Royal Infirmary                                                                                                                                              | Stirling Royal Infirmary                                                                                                                                                                                           |
|-----------------------------------------------------------------------------------|----------------------------------------------------------------------------------------------------------------------------------------------------------------------|--------------------------------------------------------------------------------------------------------------------------------------------------------------------------------------------------------------------|
| How daily bundle delivery of care was assessed                                    | VAP bundle section on daily goals sheet. Filled in by doctors on ward round. Sheets collected, sampled once a week, the day varied,                                  | Daily charge nurse evaluation including chart review, observation and discussion with the bedside nurse. Recorded on a standard form.                                                                              |
| Sedation to be reviewed and, if appropriate, stopped each day                     | Time for stopping sedation recorded on daily goals sheet, or documented reason for not doing so.                                                                     | Evidence that sedative infusions had been stopped or documented reason for not stopping sedation.                                                                                                                  |
| All patients will be assessed for weaning and extubation each day                 | Written record on daily goals sheet of a target to reduce ventilator support to by end of day or a documented reason why weaning of ventilation was not appropriate. | Evidence of a plan to reduce ventilatory support or that ventilator support had already been reduced or a documented clinical contraindication such as respiratory distress or deteriorating respiratory function. |
| Avoid the supine position, aiming to have the patient at least 30 degrees head up | Record on daily goals sheet denoting required nursing position or a clinical reason to avoid the head up position. 30° angles were illustrated at every bedspace.    | Evidence that the patient was being nursed in at least a 30° head up position or a documented clinical contraindication. 30° and 45° angles were illustrated at every bedspace and the angle assessed visually.    |
| Use chlorhexidine as part of daily mouth care                                     | Record that prescription and use of chlorhexidine antiseptics as part of daily mouth care had been written and given.                                                | Evidence of chlorhexidine antiseptics as part of daily mouth care. Liquid "Corsodyl" mouthwash was administered with an absorbent sponge to oral cavity and teeth during oral hygiene.                             |

Table 1 Legend: Operational definitions used in each ICU to assess whether or not individual bundle elements were delivered.

## Glasgow Royal Infirmary VAP Prevention Bundle Reliability (%) and VAP rate per 1000 ventilator days

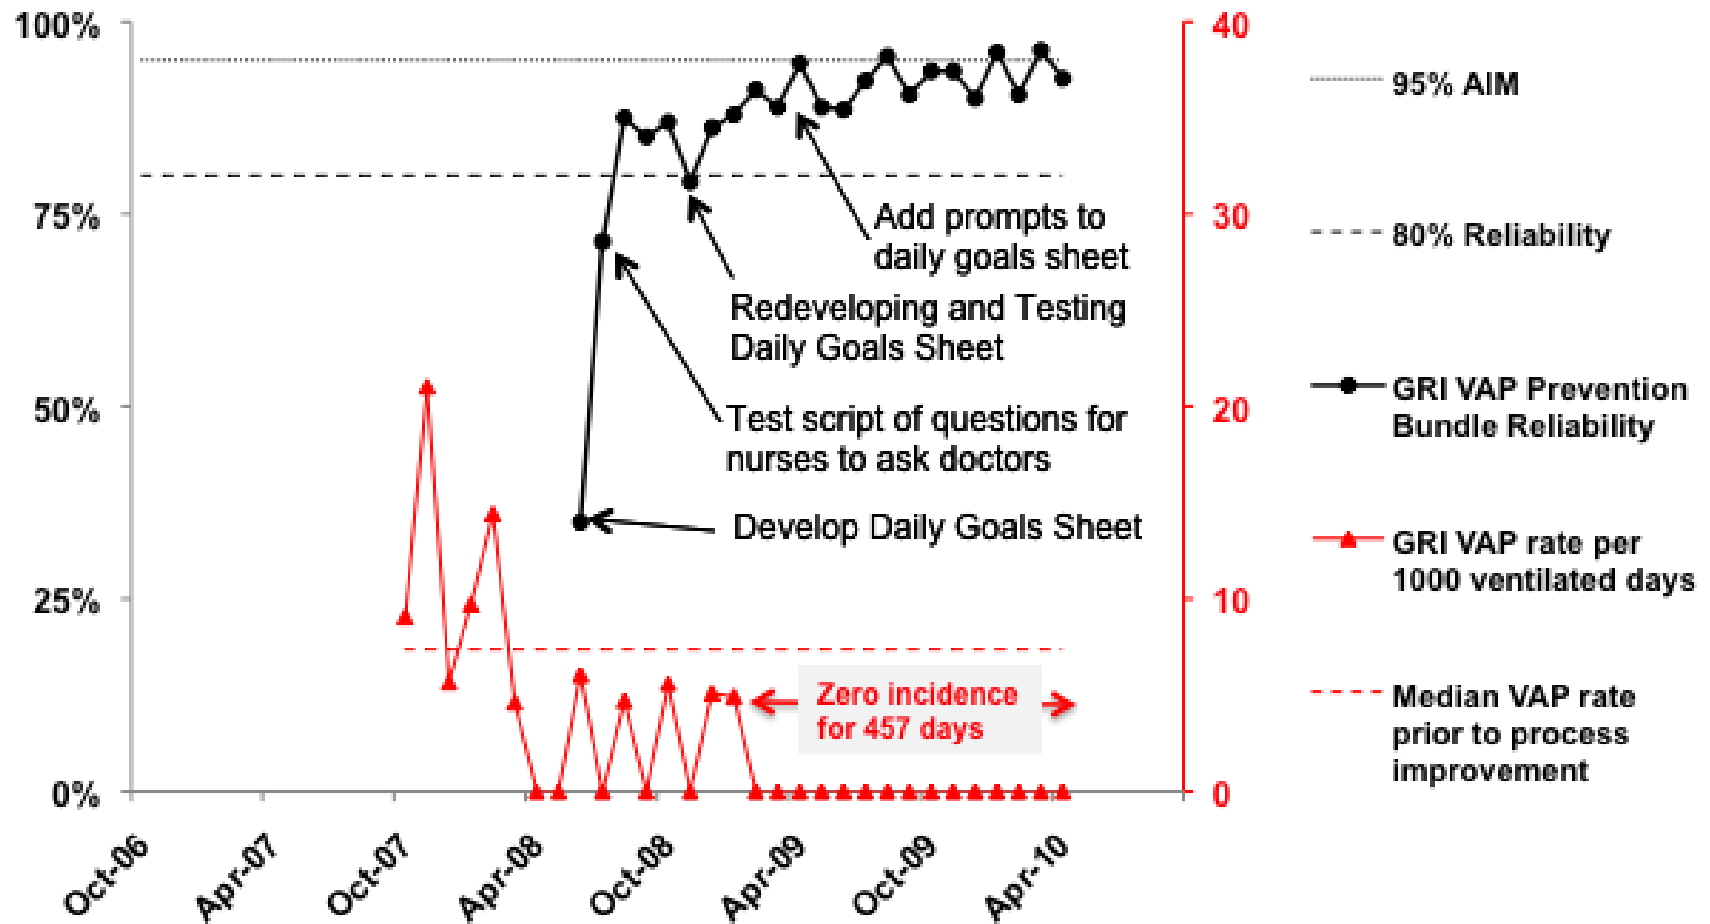

Figure 2 Legend: Run chart of monthly VAP rate per 1000 ventilated days (primary y-axis) and VAP prevention bundle adherence (secondary y-axis) in Glasgow Royal Infirmary ICU

### Glasgow Royal Infirmary VAP Prevention Bundle Reliability (%) and VAP rate per 1000 ventilator days

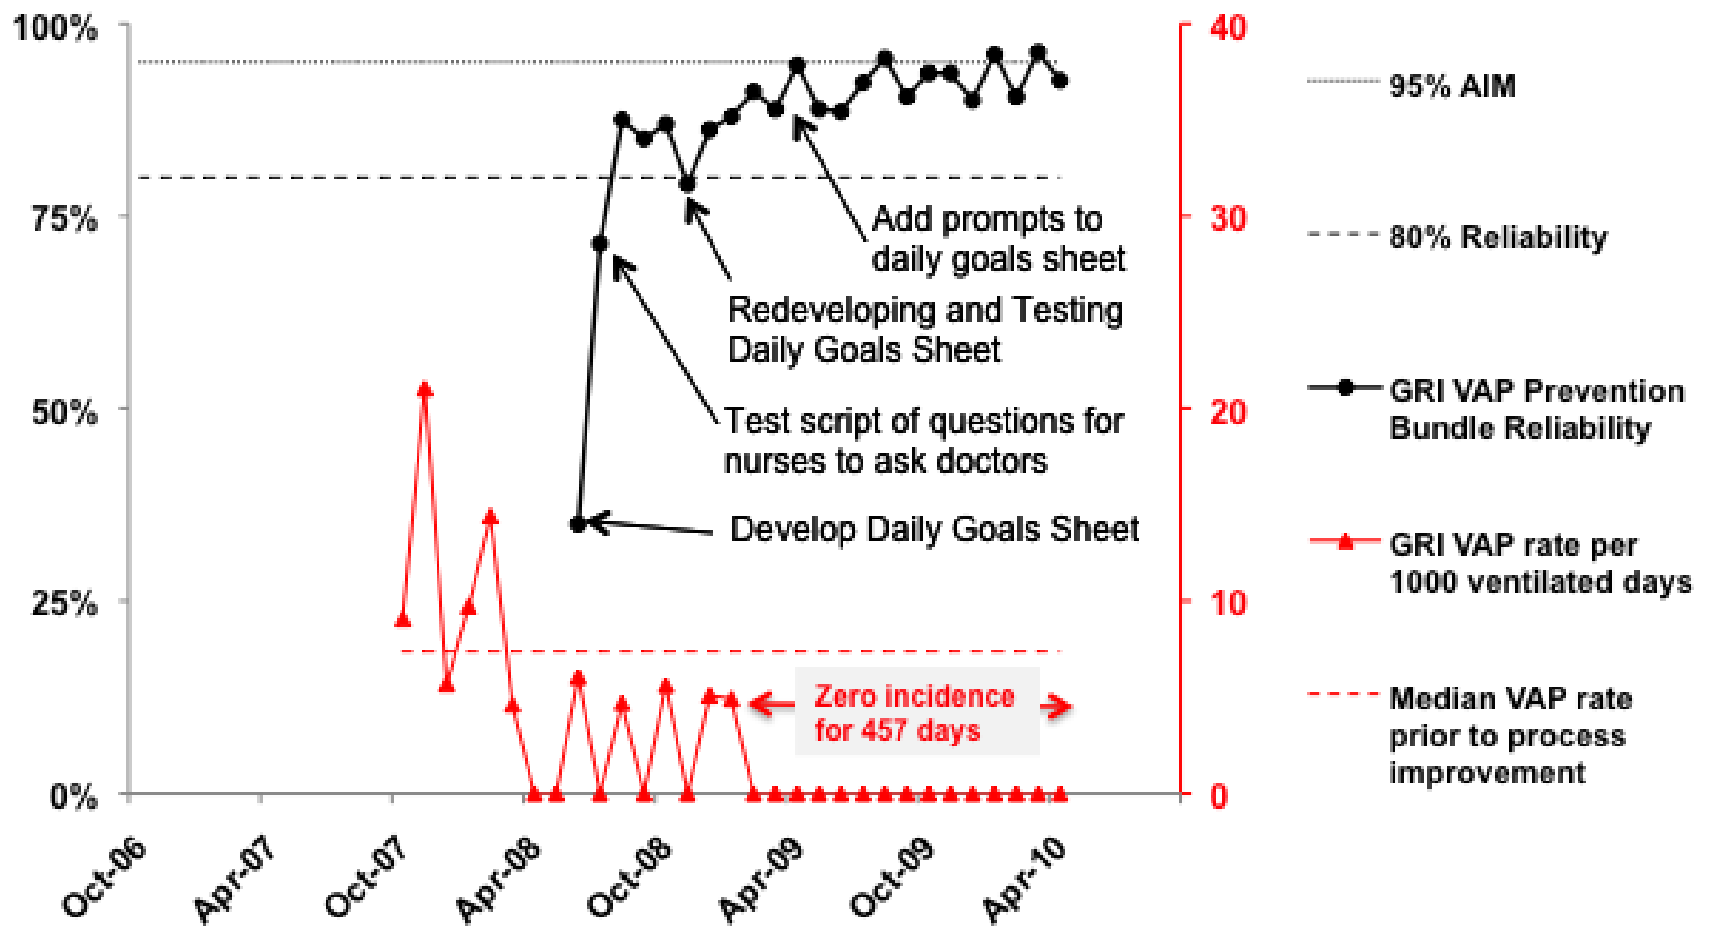

Figure 3 Legend: Run chart of monthly VAP rate per 1000 ventilated days (primary y-axis) and VAP prevention bundle adherence (secondary y-axis) in Glasgow Royal Infirmary ICU
